# Supplementary material for: Mpox Hepatic and Pulmonary Lesions in HIV/Hepatitis B Virus Co-Infected Patient, France
Source: PubMed Central journal article supplement (PMC11521180; doi:10.3201/eid3011.241331), 2024-11
Supplement: 24-1331-Techapp-s1.pdf [file 24-1331-Techapp-s1.pdf]

# Mpox Hepatic and Pulmonary Lesions in HIV/Hepatitis B Virus Co-Infected Patient, France

## Appendix

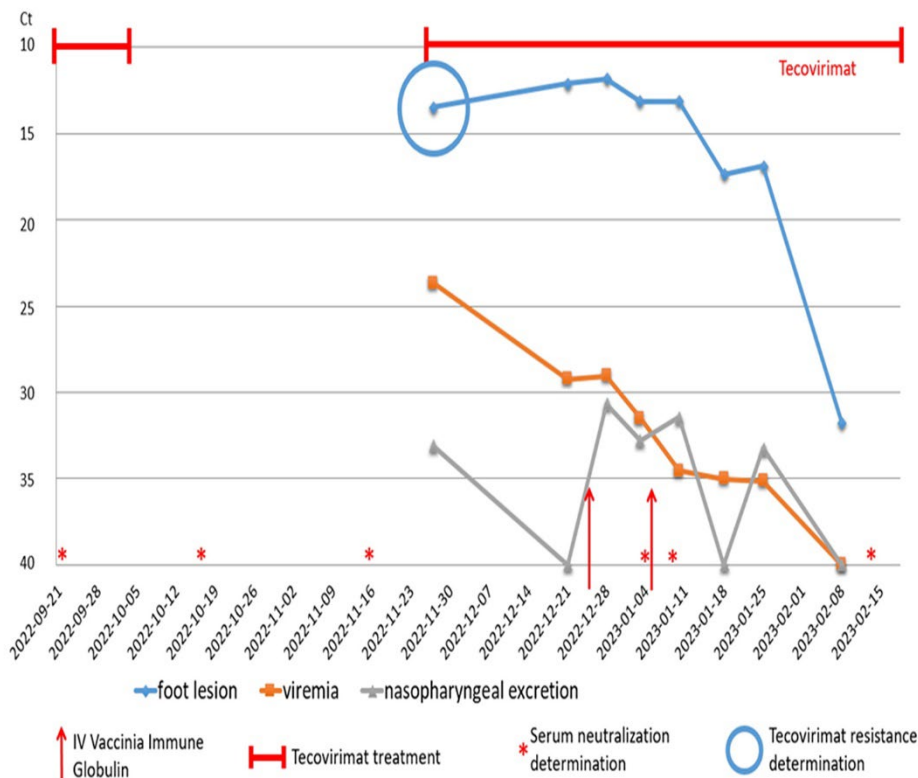

**Appendix Figure.** Monkeypox virus (MPXV) detected by PCR in different samples from HIV/hepatitis B virus co-infected patient during tecovirimat treatment, France. MPXV load was determined by PCR during oral treatment with 600 mg tecovirimat 2×/day along with 2 VIGIV treatments. MPXV was measured by using the RealStar Zoonotic Orthopoxvirus PCR kit (altona Diagnostics, <https://www.altona-diagnostics.com>). Cts were measured for blood, skin (from foot), and nasopharyngeal samples. Dates of PCR and serum neutralization assays and time course of tecovirimat treatments are indicated. Ct, cycle threshold; IV, intravenous.
